# Supplementary material for: The suitability of NONO-TFE3 dual-fusion FISH assay as a diagnostic tool for NONO-TFE3 renal cell carcinoma
Source: PubMed Central journal article supplement (PMC7530984; doi:10.1038/s41598-020-73309-4), 2020-10-01
Supplement: 41598_2020_73309_MOESM1_ESM.pdf [file 41598_2020_73309_MOESM1_ESM.pdf]

**The suitability of *NONO-TFE3* dual-fusion FISH assay as a  
diagnostic tool for *NONO-TFE3* renal cell carcinoma**

Ning Liu<sup>1</sup>, Wei Guo<sup>2,3</sup>, Qiancheng Shi<sup>1</sup>, Wenyuan Zhuang<sup>1</sup>, Xiaohong Pu<sup>4</sup>, Shaoyu Chen<sup>5</sup>, Feng Qu<sup>1</sup>, Linfeng Xu<sup>1</sup>, Xiaozhi Zhao<sup>1</sup>, Xiaogong Li<sup>1</sup>, Gutian Zhang<sup>1</sup>, Hongqian Guo<sup>1</sup>, Weidong Gan<sup>1,2,+,\*</sup>, Dongmei Li<sup>6,7,+,\*</sup>

Supplementary Table 1. Immunohistochemical findings for *NONO-TFE3* renal cell carcinomas.

| Case | TFE3 | TFEB | RCC | CD10 | CD117 | P504S | Ki-67 | Vim | CA-IX | CK-7 |
|------|------|------|-----|------|-------|-------|-------|-----|-------|------|
| 1    | +++  | -    | +++ | +++  | -     | +++   | 1%    | -   | -     | -    |
| 2    | +++  | -    | +++ | +++  | -     | ++    | 3%    | -   | -     | -    |
| 3    | +++  | +    | +   | +    | -     | +     | 4%    | -   | -     | -    |
| 4    | +++  | -    | ++  | ++   | +     | +     | 10%   | -   | -     | -    |
| 5    | +++  | -    | +++ | ++   | -     | +     | 2%    | -   | -     | -    |

Supplementary Table 2. Comparison of three genotypes of Xp11.2 translocation RCC.

| Fusion type                   | <i>ASPSCR1-TFE3</i>                                                                                                                                                                                      | <i>PRCC-TFE3</i>                                                                                                                                                                                 | <i>NONO-TFE3</i>                                                                                                                                                           |
|-------------------------------|----------------------------------------------------------------------------------------------------------------------------------------------------------------------------------------------------------|--------------------------------------------------------------------------------------------------------------------------------------------------------------------------------------------------|----------------------------------------------------------------------------------------------------------------------------------------------------------------------------|
| Median age                    | 23.5 ys (7 ys to 38 ys)                                                                                                                                                                                  | 32.5 ys (22 ys to 64 ys)                                                                                                                                                                         | 41.2 ys (26 ys to 55 ys)                                                                                                                                                   |
| Gender ratio (Female to male) | 5:3                                                                                                                                                                                                      | 5:3                                                                                                                                                                                              | 2:3                                                                                                                                                                        |
| Median Tumor size             | 4.3 cm (3-8.6 cm)                                                                                                                                                                                        | 4.8 cm (3-12.4 cm)                                                                                                                                                                               | 3.6 cm (3-5 cm)                                                                                                                                                            |
| Pathology features            | Alveolar or pseudopapillary architecture; extensive psammomatous calcification; Positive to TFE3 IHC; Positive to <i>TFE3</i> spilt FISH assays; Positive to <i>ASPSCR1-TFE3</i> dual-fusion FISH assays | Alveolar or pseudopapillary architecture; less psammomatous calcification; Positive to TFE3 IHC; Positive to <i>TFE3</i> spilt FISH assays; Positive to <i>PRCC-TFE3</i> dual-fusion FISH assays | Biphasic pattern; columnar cells with clear cytoplasm; Positive to TFE3 IHC; Equivocal <i>TFE3</i> spilt FISH assays; Positive to <i>NONO-TFE3</i> dual-fusion FISH assays |
| 1 years PFS                   | 87.5%                                                                                                                                                                                                    | 75.0%                                                                                                                                                                                            | 80%                                                                                                                                                                        |
| 3 years PFS                   | 72.9%                                                                                                                                                                                                    | 62.5%                                                                                                                                                                                            | 80%                                                                                                                                                                        |

PFS: progression free survival.
